# Supplementary material for: Development of normalized quantitative measures of lumbar disc degeneration
Source: PubMed Central journal article supplement — JOR Spine. 2023 Sep 12;6(3):e1278. doi: 10.1002/jsp2.1278 (PMC10540817; doi:10.1002/jsp2.1278), 2023-09-12
Supplement: JSP2-6-e1278-s001.pdf [file JSP2-6-e1278-s001.pdf]

Supplemental Material: Development of Normalised Quantitative Measures of Lumbar Disc Degeneration

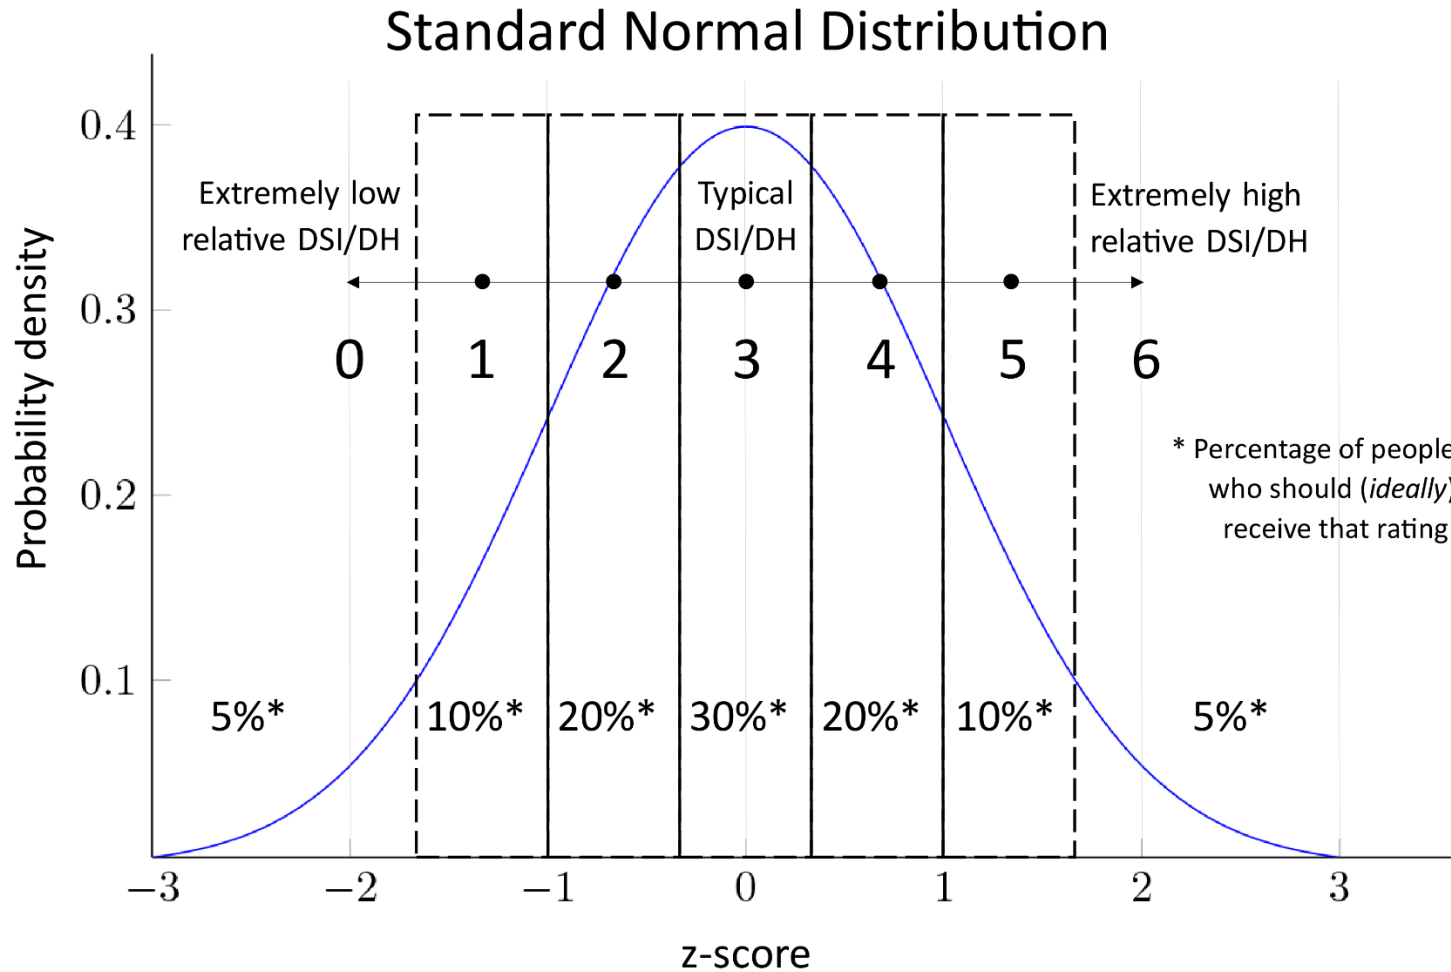

Figure S1. Graphical definition for the Radiologist's Normalised Measures.

**Table S1. Written definitions for the Radiologist's Normalised Measures.**

| <b>Measure</b> | <b>Radiologist's Normalised DSI<sup>1</sup></b> | <b>Radiologist's Normalised DH<sup>2</sup></b> |
|----------------|-------------------------------------------------|------------------------------------------------|
| 6              | Extremely high relative to typical DSI          | Extremely high relative to typical DH          |
| 5              | Much higher than typical DSI                    | Much higher than typical DH                    |
| 4              | Moderately higher than typical DSI              | Moderately higher than typical DH              |
| 3              | Typical DSI                                     | Typical DH                                     |
| 2              | Moderately lower than typical DSI               | Moderately lower than typical DH               |
| 1              | Much lower than typical DSI                     | Much lower than typical DH                     |
| 0              | Extremely low relative to typical DSI           | Extremely low relative to typical DH           |

<sup>1</sup> “Typical DSI” is relative to surrounding intensities, age, sex, and disc level. <sup>2</sup> “Typical DH” is relative to vertebral/lumbar height, age, sex, and disc level.

**Table S2. Results from the ICC reliability tests of the MRI Data.**

| <b>MRI Measurement</b>            | <b>ICC (n=25)</b> | <b>95% CI</b> |
|-----------------------------------|-------------------|---------------|
| Mean disc signal intensity        | 1.00              | [0.99,1.00]   |
| Mean CSF signal intensity         | 0.98              | [0.95,0.99]   |
| Mean spinal cord signal intensity | 0.99              | [0.99,1.00]   |
| Anterior disc height              | 0.98              | [0.95,0.99]   |
| Middle disc height                | 0.96              | [0.87,0.98]   |
| Posterior disc height             | 0.90              | [0.79,0.96]   |
| Anterior vertebral body height    | 0.97              | [0.89,0.99]   |
| Middle vertebral body height      | 0.98              | [0.95,0.99]   |
| Posterior vertebral body height   | 0.95              | [0.88,0.98]   |
| Anterior L1-L4 height             | 0.99              | [0.99,1.00]   |
| Middle L1-L4 height               | 0.99              | [0.98,1.00]   |
| Posterior L1-L4 height            | 0.99              | [0.98,1.00]   |
| Anterior L4-S1 height             | 0.97              | [0.93,0.99]   |
| Middle L4-S1 height               | 0.96              | [0.91,0.98]   |
| Posterior L4-S1 height            | 0.95              | [0.88,0.98]   |

ICC := intraclass correlation coefficient; 95% CI := 95% confidence interval. All

measurements were taken using a midsagittal view.
